# Supplementary material for: The human-snail transmission environment shapes long term schistosomiasis control outcomes: Implications for improving the accuracy of predictive modeling
Source: PubMed Central journal article supplement (PMC5983867; doi:10.1371/journal.pntd.0006514), 2018-05-21
Supplement: pntd.0006514.s001.pdf [file pntd.0006514.s001.pdf]

## Supporting Information S1 File: The Stratified Worm Burden (SWB) model and its calibration.

### A. Human - snail transmission system

The stratified worm burden (SWB) approach to modeling *Schistosoma* transmission stratifies the at-risk human host population by their worm burdens,  $H = \sum_{m \geq 0} h_m(t)$ , each stratum carrying  $m$  worms/person (more generally between  $m\Delta w \leq V < (m+1)\Delta w$ , with specified worm step  $\Delta w > 1$ ). The transition among strata is described by matrix  $M(\lambda, \gamma, \mu)$ , and age/group specific source term  $\vec{S} = \{S_m(t)\}$  (see [1-3])

$$\frac{d\vec{h}}{dt} = M(\lambda, \gamma, \mu) \cdot \vec{h} + \vec{S} \quad (1)$$

The parameters of matrix  $M$  include snail-to-human force of infection (FOI),  $\lambda$ , the human population turnover rate,  $\mu$ , and worm mortality,  $\gamma$ . The infectivity of the SWB within the human population is determined by the mean mated worm count (MMC),  $\phi_m$ , in each stratum, and their weighted mean across strata,

$$\Phi = \sum_{m > 0} h_m \phi_m \quad (2)$$

(see, e.g. [2, 4-8]). Alternatively, one can simplify and assume a specific worm distribution such as a negative binomial distribution with mean  $w$  and aggregation constant,  $k$ . (e.g., the NB( $w, k$ ) in a MacDonald-type mean worm burden (MWB) model [9]), and get a closed functional form of  $\Phi(w, k)$ . In either case, MWB or SWB, human infectivity is the product of worm fecundity,  $\rho$ , and MMC,

$$E = \rho \Phi \quad (3)$$

In contrast to the MWB NB assumption for worm/person distribution, in our SWB approach, no a priori assumption is made about the worm distribution in the human host community. Egg release by mated females and individual hosts still depends on age-specific worm fecundity,  $\rho$ , and MMC  $\phi_m$  (for the  $h_m$  - stratum). In our approach, a host in  $m$ -th stratum is assumed to release random daily egg amounts following a negative binomial (NB)-distribution with mean

$E_m = \rho \phi_m$ , and aggregation parameter  $k_m = k \phi_m$  [3, 10, 11]. So any test pool of an SWB community with population strata  $\{h_m\}$  is viewed as random draw of the NB-mixture distribution with weights  $h_m$ .

At the endemic (equilibrium) state, strata variables  $\{h_m(\lambda)\}$  are determined by age-specific FOI  $\lambda$ . Hence mean mated count  $\Phi(\lambda)$  and human infectivity  $E(\lambda)$  become functions of  $\lambda$ .

**Figure 2** illustrates typical equilibrium distributions for 3 sample villages.

The **snail** population-transmission model employed in our analysis was developed in earlier papers [3, 10, 12]. Here we use a simplified (S-I) version made of susceptible prevalence variables  $x + y = 1$ , assuming a stationary snail environment,

$$\frac{dy}{dt} = \Lambda(1 - y) - \nu y \quad (4)$$

**Snail-to-Human FOI**,  $\lambda$  - the human per capita rate of worm accumulation, depends on i) the intermediate larval stage (cercaria) density,  $C$ , in local water bodies, ii) the rate of human exposure to affected water bodies (contact rate),  $\omega$ , and iii) human susceptibility to infection,  $\alpha$  (probability of worm establishment/ water contact),

$$\lambda = \alpha \omega C = A y \quad (5)$$

-a linear function of infected snail prevalence.

**Human-to-Snail FOI**,  $\Lambda$ , depends on parasite miracidial density,  $M$ , snail density,  $N$ , snail susceptibility (probability of successful invasion),  $\beta$ , and the maximal rate of snail invasion by miracidia,  $\Lambda_0$ . In the present model, we propose the following nonlinear (saturated) function for  $\Lambda$ ,

$$\Lambda = \Lambda_0 \left(1 - e^{-\beta M/N}\right) \quad (6)$$

Fraction  $\left(1 - e^{-\beta M/N}\right)$  is derived from hypothesized Poisson distribution of the “miracidia per snail” variable with mean value  $M/N$ . It represents the probability of one or more successful

invasions. Miracidial density,  $M = b H E$ , depends on human host population size  $H$ , and human infectivity  $E$ , so

$$\Lambda(E, N) = \Lambda_0 \left(1 - e^{-b E H / N}\right) \quad (7)$$

Maximal invasion rate is a function of snail density  $N$ , and other biological/environmental inputs (see, e.g. [13]). However, in the current analysis we treat it as a single (uncertain) parameter to be estimated from other transmission inputs.

The nonlinear function  $\Lambda(E, N)$  (7) can be approximated by the linear form,  $\Lambda \approx B E$ , provided exponent  $b E H / N \ll 1$ , that is, the combined “human contagion” is small relative to snail density. Such a linear assumption for snail FOI was commonly used in past transmission modeling (e.g. [1, 4, 14, 15]). The resulting transmission coefficient  $B$ , is then proportional to human population size,  $H$ , and their water contact rate  $\omega$ .

Human infectivity,  $E$ , in equation (7) depends on host population makeup and age –specific exposure/ contamination patterns of different population age groups (children (C) and adults (A)). A single SWB has  $E = \rho \Phi(\lambda)$ ; for mixed population groups C and A, infectivities  $\{E_C, E_A\}$  are weighted in proportion to population fractions ( $H_i$ ), and relative (adult vs. child) exposure factors,  $\omega = \omega_A / \omega_C$  [3, 10]. The net result is combined human infectivity

$$E(\omega) = \rho_C \left( H_C \Phi(\lambda_C) + \frac{\rho_A}{\rho_C} \omega H_A \Phi(\lambda_A) \right). \quad (8)$$

-function of calibrated human parameters  $\{(\lambda_i, \rho_i)\}$  drawn from the posterior ensemble of best fit parameters based on our calibration (explained below).

## B. Coupled human-snail system and model calibration

Human and snail equations (1) - (4) are coupled via two transmission coefficients  $A$  (snail-to-human) and  $B$  (human-to-snail). The  $A$  -coefficient is included in the human FOI expression  $\lambda = A y$  (infected snail prevalence), and coefficient  $B$  is included in the exponent of the nonlinear snail FOI,  $\Lambda$ . The details of model calibration and estimated parameter values are explained in previously published papers [3, 10]. It proceeds in two steps: (i) *human calibration* for  $(\lambda_i, k_i, \rho_i)$  which are snail-to-human FOI, aggregation, and worm fecundity, estimated from

test data (stool eggs per gram (epg, *S. mansoni*) or eggs per 10 mL by urine filtration (*S. haematobium*)); (ii) *transmission calibration*, for other coefficients (see Table A1).

Model inputs include

- (i) **Human parameters:** age-specific triplets  $(\lambda_i, k_i, \rho_i)$ ,  $i = \{C, A\}$  which enter human infectivity function,  $E_i = \rho_i \Phi(\lambda_i)$ . Table A2 gives the results of human calibration (parameters statistics) for 3 sample communities, and **Figure 1** shows their marginal distributions
- (ii) **Snail inputs:** infected prevalence  $y^*$
- (iii) **Environmental/behavioral inputs:**  $b$  – child transmission coefficient,  $\omega$  - relative (adult/child) exposure contamination

Specifically, for A, coefficients are estimated from calibrated human FOI  $\lambda_i$  and (known or hypothesized) infected snail density  $y$

$$A_i = \frac{\lambda_i}{y}; i = \{C, A\} \quad (9)$$

For linear form of snail FOI (used in model M1), transmission coefficient  $B$  is estimated from the equilibrium snail equation (4) as

$$B(\omega) = \frac{\nu y^*}{(1 - y^*) E(\omega)} \quad (10)$$

with combined infectivity function **Error! Reference source not found..**

For the nonlinear form of snail FOI (used in model M2) calibration proceeds differently: instead of estimating the pairs  $(A_i, B)$ , we estimate  $(A_i, \Lambda_0)$ ,

$$\Lambda_0(b, \omega) = \frac{\nu y^*}{(1 - y^*)(1 - e^{-b E(\omega)})} \quad (11)$$

We sample model uncertainties to provide estimates of variance, and generate a 95% uncertainty interval (UI) in the transmission projection for control interventions.

**Table A1: Summary of model parameters**

|                          | Known, fixed                                                                                                                     | Calibrated                                                                                                                              |               |
|--------------------------|----------------------------------------------------------------------------------------------------------------------------------|-----------------------------------------------------------------------------------------------------------------------------------------|---------------|
| Human                    | Demographic inputs                                                                                                               | Posterior distributions of $\{\lambda^i, \rho^i, k^i\}$ , for age-groups $i = \{C, A\}$ , estimated from community test data ([16, 17]) |               |
|                          |                                                                                                                                  |                                                                                                                                         | C      A      |
|                          | Population fractions                                                                                                             |                                                                                                                                         | 0.49    0.51  |
|                          | Host turnover/year                                                                                                               |                                                                                                                                         | 0.06    0.025 |
|                          | Worm mortality/year                                                                                                              | 0.2      0.25                                                                                                                           |               |
| Snail                    | Mortality: $\nu = 4$ /year,<br>Infected prevalence (baseline endemic value) <sup>a</sup> : $y^* = .3$ (range .15–.45 )           | Estimated<br>Max invasion (FOI) rate: $\Lambda_0$                                                                                       |               |
| Environment/<br>behavior | Basic (child) transmission rate:<br>$.5 < b < 5$<br>Relative exposure/contamination rates<br>("adult/child): $.5 < \omega < 1.5$ | Transmission coefficients $A_i = \lambda^i / Z$                                                                                         |               |

<sup>a</sup> These ranges are broadly consistent with published data [16, 18].

**Table A2: Calibrated posterior parameters for 3 Kenyan communities (H – heavy, M – moderate, L –light)**

|          |         | $\lambda_C$ | $\lambda_A$ | $k_C$ | $k_A$ | $\rho_C$ | $\rho_A$ |
|----------|---------|-------------|-------------|-------|-------|----------|----------|
| <i>H</i> | Min     | 1.8         | 0.51        | 0.018 | 0.014 | 9.8      | 4.6      |
|          | Max     | 5.9         | 1.7         | 0.083 | 0.045 | 35.      | 12.      |
|          | Median  | 2.8         | 0.85        | 0.044 | 0.026 | 20.      | 8.3      |
|          | Mean    | 3.1         | 0.91        | 0.046 | 0.027 | 21.      | 8.4      |
|          | SD/Mean | 0.31        | 0.31        | 0.36  | 0.3   | 0.3      | 0.23     |
| <i>M</i> | Min     | 0.54        | 0.18        | 0.049 | 0.007 | 40.      | 2.9      |
|          | Max     | 0.69        | 0.95        | 0.077 | 0.048 | 55.      | 14.      |
|          | Median  | 0.6         | 0.33        | 0.063 | 0.023 | 47.      | 8.2      |
|          | Mean    | 0.61        | 0.37        | 0.063 | 0.024 | 47.      | 8.2      |
|          | SD/Mean | 0.059       | 0.42        | 0.11  | 0.42  | 0.079    | 0.33     |
| <i>L</i> | Min     | 0.37        | 0.035       | 0.045 | 0.016 | 28.      | 3.3      |
|          | Max     | 0.51        | 0.2         | 0.084 | 0.12  | 44.      | 14.      |
|          | Median  | 0.43        | 0.067       | 0.064 | 0.059 | 36.      | 8.       |
|          | Mean    | 0.43        | 0.077       | 0.064 | 0.062 | 36.      | 8.2      |
|          | SD/Mean | 0.078       | 0.44        | 0.14  | 0.43  | 0.11     | 0.32     |

## Captions

**Figure 1:** Marginal distributions of calibrated posterior distribution for 3 sample communities from coastal Kenya [20]. Demographic makeup consists of children (0-20) adult (20+). For each group, EPG test results were fitted to its  $(\lambda, \rho, k)$ - parameters

**Figure 2:** Typical endemic (baseline) SWB distributions in 3 sample communities based of calibrated posterior values  $\{\lambda_C, \lambda_A\}$

# Figures

Figure 1.

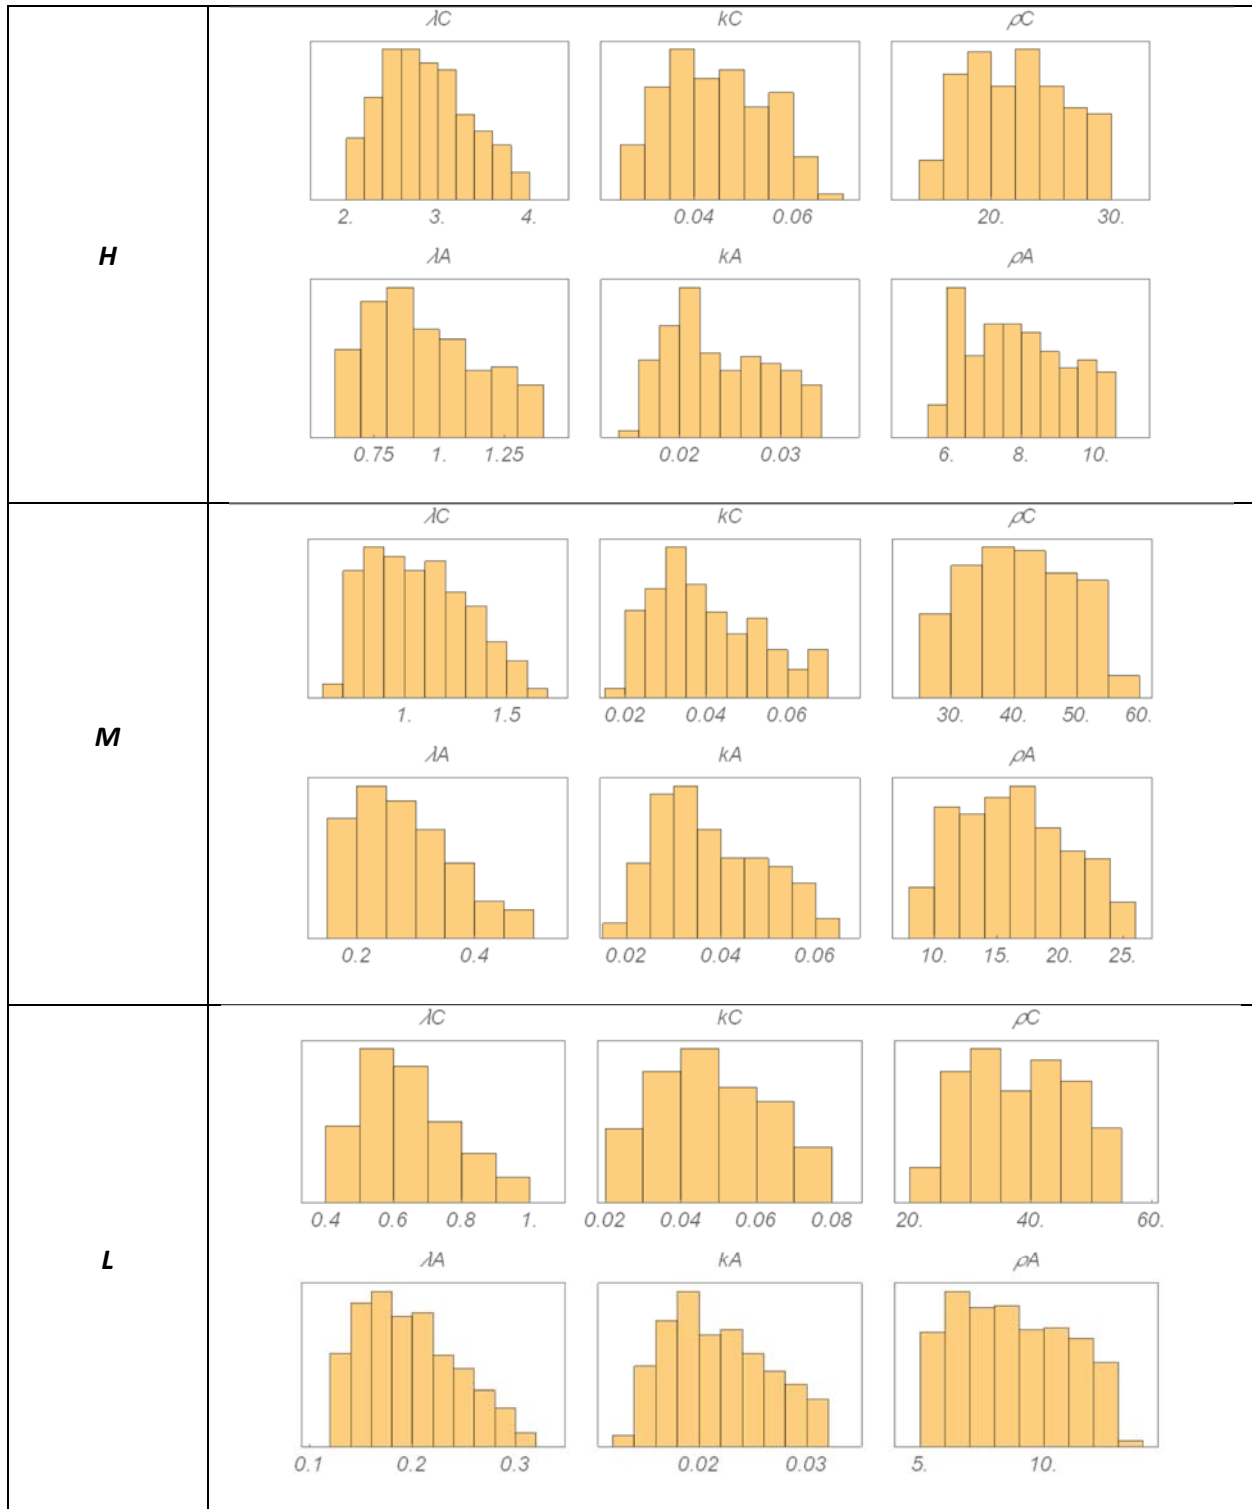



Figure 2.

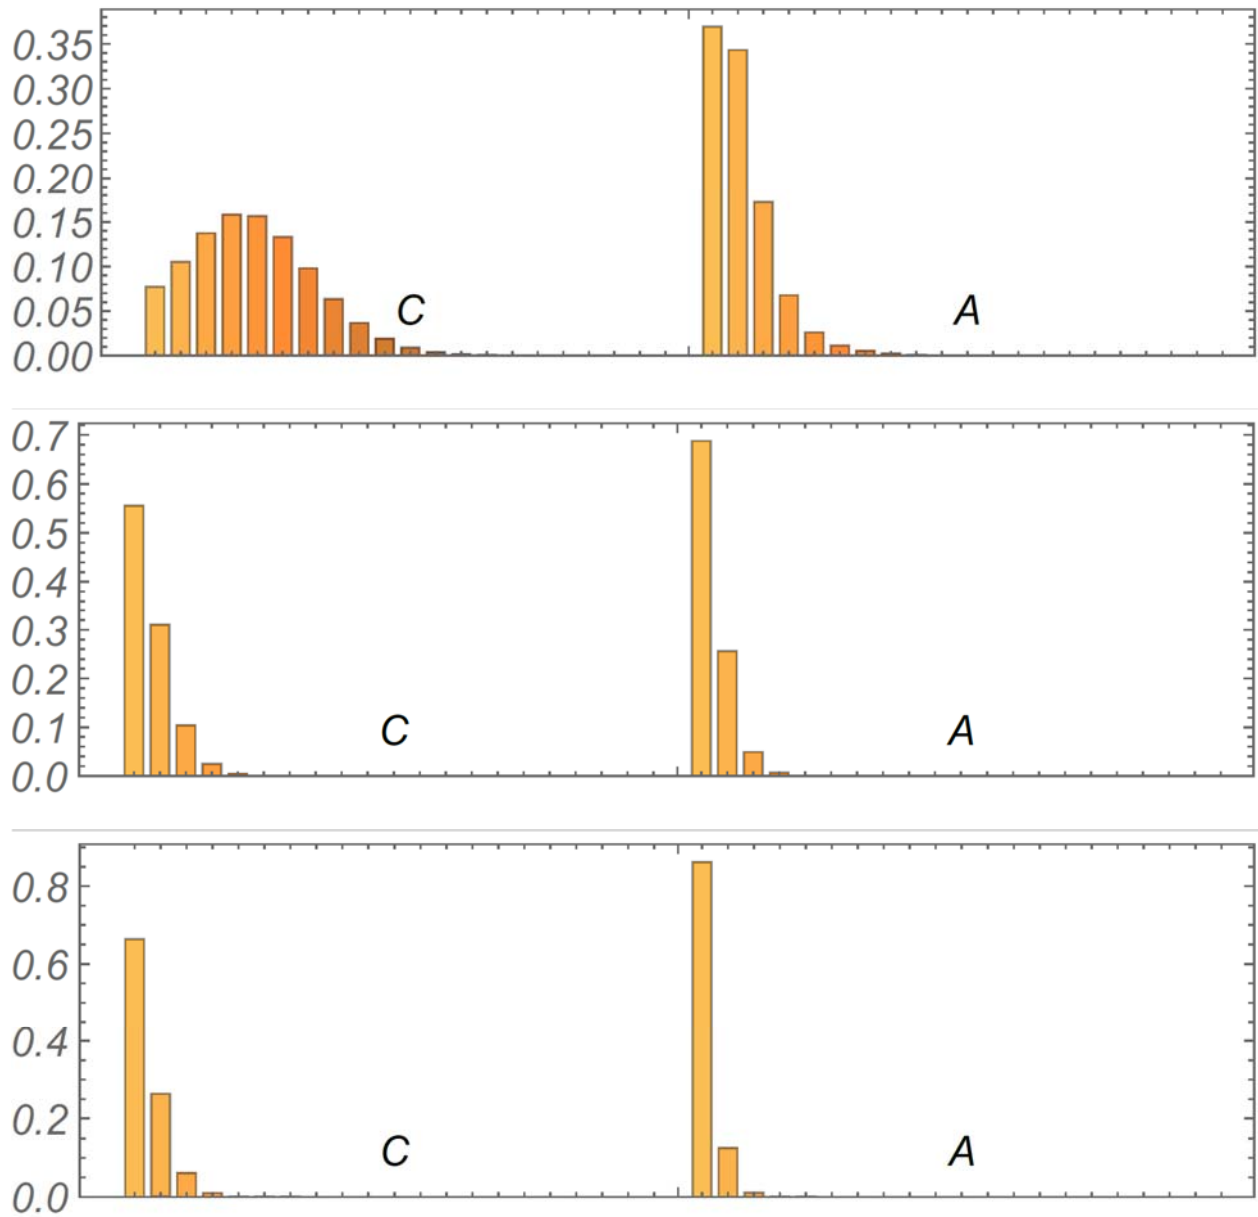

## References

1. Gurarie D, King CH, Wang X. A new approach to modelling schistosomiasis transmission based on stratified worm burden. *Parasitology*. 2010;137(13):1951-1965. Epub 2010/07/14. doi: 10.1017/S0031182010000867.
2. Gurarie D, King CH. Population biology of *Schistosoma* mating, aggregation, and transmission breakpoints: More reliable model analysis for the end-game in communities at risk. *PLoS One*. 2014;9(12):e115875. doi: 10.1371/journal.pone.0115875.
3. Gurarie D, King CH, Yoon N, Li E. Refined stratified-worm-burden models that incorporate specific biological features of human and snail hosts provide better estimates of *Schistosoma* diagnosis, transmission, and control. *Parasit Vectors*. 2016;9(1):428. doi: 10.1186/s13071-016-1681-4.
4. May RM. Togetherness among schistosomes: Its effects on the dynamics of infection. *Mathematical Biosciences*. 1977;35:301-343.
5. May RM, Woolhouse ME. Biased sex ratios and parasite mating probabilities. *Parasitology*. 1993;107(Pt 3):287-295.
6. Nasell I. Mating for schistosomes. *J Math Biol*. 1978;6(1):21-35.
7. Näsell I, Hirsch WM. The transmission dynamics of schistosomiasis. *Communications on Pure and Applied Mathematics*. 1973;26(4):395-453.
8. Shaw DJ, Grenfell BT, Dobson AP. Patterns of macroparasite aggregation in wildlife host populations. *Parasitology*. 1998;117 ( Pt 6):597-610.
9. MacDonald G. The dynamics of helminth infections, with special reference to schistosomes. *Trans R Soc Trop Med Hyg*. 1965;59(5):489-506.
10. Gurarie D, Yoon N, Li E, Ndeffo-Mbah M, Durham D, Phillips AE, et al. Modelling control of *Schistosoma haematobium* infection: predictions of the long-term impact of mass drug administration in Africa. *Parasit Vectors*. 2015;8(1):529. doi: 10.1186/s13071-015-1144-3.
11. Gryseels B, De Vlas SJ. Worm burdens in schistosome infections. *Parasitol Today*. 1996;12(3):115-119. Epub 1996/03/01. doi: 0169475896806715 [pii].
12. Gurarie D, King C, Yoon N, Alsallaq R, Wang X. Seasonal Dynamics of Snail Populations in Coastal Kenya: Model Calibration and Snail Control. *Advances in Water Resources*. 2016.
13. Gurarie E, Ovaskainen O. Towards a general formalization of encounter rates in ecology. *Theoretical Ecology*. 2013;6(2):189-202.
14. Anderson RM, May RM. *Infectious Diseases of Humans. Dynamics and Control*. New York: Oxford University Press; 1991. 467-496, 507-420 p.
15. Wang S, Spear RC. Exploring the Contribution of Host Susceptibility to Epidemiological Patterns of *Schistosoma japonicum* Infection Using an Individual-Based Model. *The American Journal of Tropical Medicine and Hygiene*. 2015. doi: 10.4269/ajtmh.14-0691.
16. Muchiri EM, Ouma JH, King CH. Dynamics and control of *Schistosoma haematobium* transmission in Kenya: an overview of the Msambweni Project. *Am J Trop Med Hyg*. 1996;55(5 Suppl):127-134.
17. Bisanzio D, Mutuku F, Bustinduy AL, Mungai PL, Muchiri EM, King CH, et al. Cross-sectional study of the burden of vector-borne and soil-transmitted polyparasitism in rural communities of Coast Province, Kenya. *PLoS Negl Trop Dis*. 2014;8(7):e2992. doi: 10.1371/journal.pntd.0002992.

18. Sturrock RF. Field studies on the transmission of *Schistosoma mansoni* and on the bionomics of its intermediate host, *Biomphalaria glabrata*, on St. Lucia, West Indies. Int J Parasitol. 1973;3(2):175-194.
19. Webbe G. Quantitative studies of intermediate host populations in the transmission of schistosomes. Proc R Soc Med. 1968;61(5):455.
20. Kariuki HC, Clennon JA, Brady MS, Kitron U, Sturrock RF, Ouma JH, et al. Distribution patterns and cercarial shedding of *Bulinus nasutus* and other snails in the Msambweni area, Coast Province, Kenya. Am J Trop Med Hyg. 2004;70(4):449-456.
